CORRECTION

# Correction: The Extracellular Loop 2 (ECL2) of the Human Histamine H4 Receptor Substantially Contributes to Ligand Binding and Constitutive Activity

The *PLOS ONE* Staff

The PDF version of [Fig. 2](#) is incorrect. The online version of [Fig. 2](#) is correct, and the authors have also provided a corrected version here.

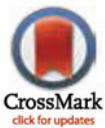

## OPEN ACCESS

**Citation:** The *PLOS ONE* Staff (2015) Correction: The Extracellular Loop 2 (ECL2) of the Human Histamine H4 Receptor Substantially Contributes to Ligand Binding and Constitutive Activity. *PLoS ONE* 10(3): e0122162. doi:10.1371/journal.pone.0122162

**Published:** March 30, 2015

**Copyright:** © 2015 The PLOS ONE Staff. This is an open access article distributed under the terms of the [Creative Commons Attribution License](#), which permits unrestricted use, distribution, and reproduction in any medium, provided the original author and source are credited.

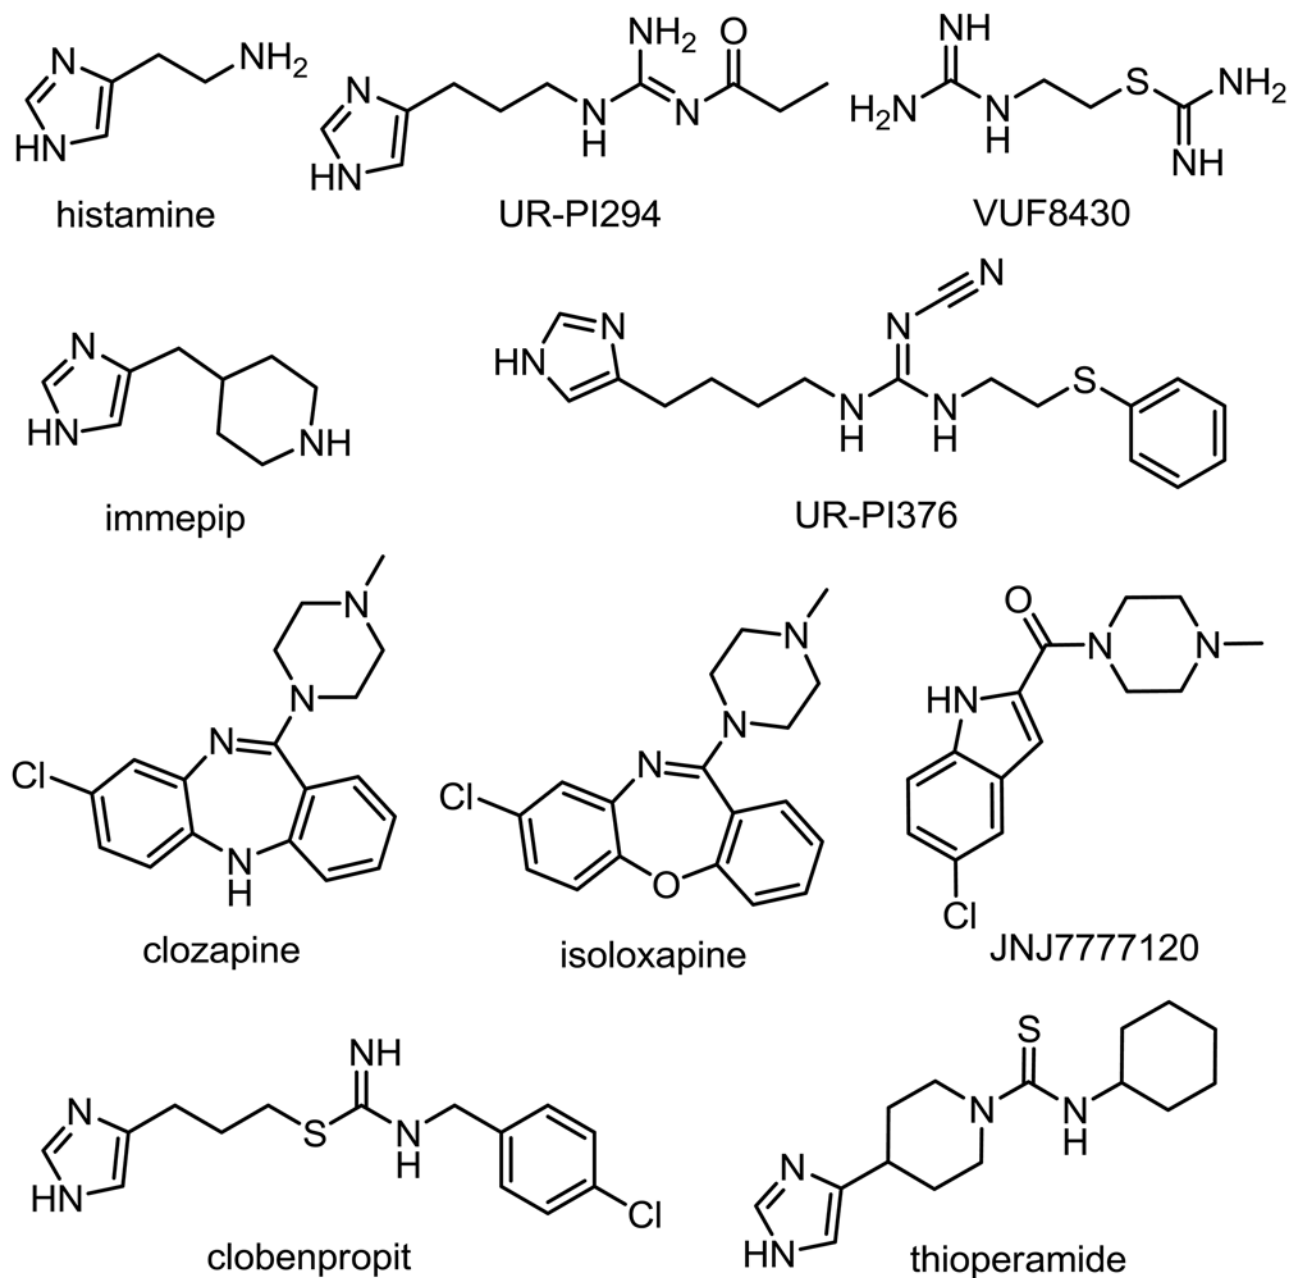

**Fig 2. Structures of the investigated H4R ligands.**

doi:10.1371/journal.pone.0122162.g001

## Reference

1. Wifling D, Bernhardt G, Dove S, Buschauer A (2015) The Extracellular Loop 2 (ECL2) of the Human Histamine H4 Receptor Substantially Contributes to Ligand Binding and Constitutive Activity. *PLoS ONE* 10(1): e0117185. doi: [10.1371/journal.pone.0122162](https://doi.org/10.1371/journal.pone.0122162) PMID: [5629160](https://pubmed.ncbi.nlm.nih.gov/2629160/)
